# Supplementary material for: Simultaneous cannabis and psychedelic use among festival and concert attendees in Colorado: characterizing enhancement and adverse reactions using mixed methods
Source: Springer Nature journal article supplement (doi:10.1186/s42238-024-00235-x), 2024-07-11
Supplement: MOESM1 [file 42238_2024_235_MOESM1_ESM.pdf]

**Supplement 1. Cannabis and Psychedelic Product Descriptives for Theme 1: Tension  
Reduction and Balancing of Psychedelic Drug Effects**

| <b>Characteristics</b>                          | <b>N</b> | <b>%</b> | <b>M</b> | <b>SD</b> | <b>Min</b> | <b>Max</b> |
|-------------------------------------------------|----------|----------|----------|-----------|------------|------------|
| Psychedelic(s) used                             |          |          |          |           |            |            |
| LSD                                             | 12       | 44.4     |          |           |            |            |
| Psilocybin                                      | 13       | 48.1     |          |           |            |            |
| DMT                                             | 1        | 3.7      |          |           |            |            |
| Mescaline                                       | 0        | 0        |          |           |            |            |
| MDMA                                            | 9        | 33.3     |          |           |            |            |
| Ketamine                                        | 7        | 25.9     |          |           |            |            |
| Cannabis product(s) used                        |          |          |          |           |            |            |
| Flower                                          | 24       | 88.9     |          |           |            |            |
| Concentrates                                    | 12       | 44.4     |          |           |            |            |
| Edibles                                         | 3        | 11.1     |          |           |            |            |
| Flower characteristics                          |          |          |          |           |            |            |
| Quantity (grams)                                |          |          | 4.81     | 4.00      | 0.50       | 14.00      |
| Within-session frequency (times used)           |          |          | 6.27     | 5.49      | 1.00       | 21.00      |
| THC content                                     |          |          |          |           |            |            |
| 0-4%                                            | 1        | 3.7      |          |           |            |            |
| 5-9%                                            | 1        | 3.7      |          |           |            |            |
| 10-14%                                          | 1        | 3.7      |          |           |            |            |
| 15-19%                                          | 5        | 18.5     |          |           |            |            |
| 20-24%                                          | 6        | 22.2     |          |           |            |            |
| 25-30%                                          | 3        | 11.1     |          |           |            |            |
| Greater than 30%                                | 2        | 7.4      |          |           |            |            |
| Unsure                                          | 5        | 18.5     |          |           |            |            |
| Missing                                         | 3        | 11.1     |          |           |            |            |
| Concentrate Characteristics                     |          |          |          |           |            |            |
| Dab quantity (# of dabs)                        |          |          | 3.40     | 2.41      | 1.00       | 6.00       |
| Cartridge quantity (# of hits)                  |          |          | 13.86    | 9.03      | 2.00       | 21.00      |
| Dab within-session frequency (times used)       |          |          | 5.80     | 4.44      | 1.00       | 11.00      |
| Cartridge within-session frequency (times used) |          |          | 10.83    | 9.26      | 1.00       | 21.00      |
| Dab THC content                                 |          |          |          |           |            |            |
| Less than 60%                                   | 0        | 0        |          |           |            |            |
| 60-69%                                          | 1        | 3.7      |          |           |            |            |
| 70-79%                                          | 4        | 14.8     |          |           |            |            |
| 80-90%                                          | 0        | 0        |          |           |            |            |
| Greater than 90%                                | 0        | 0        |          |           |            |            |
| Unsure                                          | 2        | 7.4      |          |           |            |            |
| Missing                                         | 20       | 74.1     |          |           |            |            |
| Cartridge THC content                           |          |          |          |           |            |            |
| Less than 50%                                   | 1        | 3.7      |          |           |            |            |
| 50-59%                                          | 1        | 3.7      |          |           |            |            |
| 60-69%                                          | 1        | 3.7      |          |           |            |            |
| 70-79%                                          | 0        | 0        |          |           |            |            |
| 80-90%                                          | 2        | 7.4      |          |           |            |            |
| Greater than 90%                                | 0        | 0        |          |           |            |            |
| Unsure                                          | 3        | 11.1     |          |           |            |            |
| Missing                                         | 19       | 70.4     |          |           |            |            |
| Edible Characteristics                          |          |          |          |           |            |            |
| Edibles THC content (milligrams)                |          |          | 70.00    | 51.96     | 10.00      | 100.00     |
| Edibles within-session frequency (times used)   |          |          | 1.20     | 0.45      | 1.00       | 2.00       |

**Supplement 2. Cannabis and Psychedelic Product Descriptives for Theme 2: Enhancement to Psychological Processes**

| <b>Characteristics</b>                          | <b>N</b> | <b>%</b> | <b>M</b> | <b>SD</b> | <b>Min</b> | <b>Max</b> |
|-------------------------------------------------|----------|----------|----------|-----------|------------|------------|
| Psychedelic(s) used                             |          |          |          |           |            |            |
| LSD                                             | 6        | 54.5     |          |           |            |            |
| Psilocybin                                      | 6        | 54.5     |          |           |            |            |
| DMT                                             | 1        | 9.1      |          |           |            |            |
| Mescaline                                       | 0        | 0        |          |           |            |            |
| MDMA                                            | 3        | 27.3     |          |           |            |            |
| Ketamine                                        | 1        | 9.1      |          |           |            |            |
| Cannabis product(s) used                        |          |          |          |           |            |            |
| Flower                                          | 10       | 90.9     |          |           |            |            |
| Concentrates                                    | 6        | 54.5     |          |           |            |            |
| Edibles                                         | 2        | 18.2     |          |           |            |            |
| Flower characteristics                          |          |          |          |           |            |            |
| Quantity (grams)                                |          |          | 4.78     | 5.27      | 0.20       | 14.00      |
| Within-session frequency (times used)           |          |          | 5.78     | 6.26      | 1.00       | 21.00      |
| THC content                                     |          |          |          |           |            |            |
| 0-4%                                            | 0        | 0        |          |           |            |            |
| 5-9%                                            | 0        | 0        |          |           |            |            |
| 10-14%                                          | 0        | 0        |          |           |            |            |
| 15-19%                                          | 2        | 18.2     |          |           |            |            |
| 20-24%                                          | 3        | 27.3     |          |           |            |            |
| 25-30%                                          | 1        | 9.1      |          |           |            |            |
| Greater than 30%                                | 1        | 9.1      |          |           |            |            |
| Unsure                                          | 3        | 27.3     |          |           |            |            |
| Missing                                         | 1        | 9.1      |          |           |            |            |
| Concentrate Characteristics                     |          |          |          |           |            |            |
| Dab quantity (# of dabs)                        |          |          | 8.25     | 8.62      | 3.00       | 21.00      |
| Cartridge quantity (# of hits)                  |          |          | 11.33    | 9.07      | 3.00       | 21.00      |
| Dab within-session frequency (times used)       |          |          | 3.33     | 0.58      | 3.00       | 4.00       |
| Cartridge within-session frequency (times used) |          |          | 7.50     | 3.54      | 5.00       | 10.00      |
| Dab THC content                                 |          |          |          |           |            |            |
| Less than 50%                                   | 0        | 0        |          |           |            |            |
| 50-59%                                          | 1        | 9.1      |          |           |            |            |
| 60-69%                                          | 0        | 0        |          |           |            |            |
| 70-79%                                          | 1        | 9.1      |          |           |            |            |
| 80-90%                                          | 1        | 9.1      |          |           |            |            |
| Greater than 90%                                | 0        | 0        |          |           |            |            |
| Unsure                                          | 2        | 18.2     |          |           |            |            |
| Missing                                         | 6        | 54.5     |          |           |            |            |
| Cartridge THC content                           |          |          |          |           |            |            |
| Less than 50%                                   | 1        | 9.1      |          |           |            |            |
| 50-59%                                          | 0        | 0        |          |           |            |            |
| 60-69%                                          | 2        | 18.2     |          |           |            |            |
| 70-79%                                          | 0        | 0        |          |           |            |            |
| 80-90%                                          | 0        | 0        |          |           |            |            |
| Greater than 90%                                | 0        | 0        |          |           |            |            |
| Unsure                                          | 1        | 9.1      |          |           |            |            |
| Missing                                         | 7        | 63.6     |          |           |            |            |
| Edible Characteristics                          |          |          |          |           |            |            |
| Edibles THC content (milligrams)                |          |          | 65.00    | 49.50     | 30.00      | 100.00     |
| Edibles within-session frequency (times used)   |          |          | 2.00     | 1.00      | 1.00       | 3.00       |

**Supplement 3. Cannabis and Psychedelic Product Descriptives for Theme 3: Intensified Psychedelic Drug Effects**

| <b>Characteristics</b>                          | <b>N</b> | <b>%</b> | <b>M</b> | <b>SD</b> | <b>Min</b> | <b>Max</b> |
|-------------------------------------------------|----------|----------|----------|-----------|------------|------------|
| Psychedelic(s) used                             |          |          |          |           |            |            |
| LSD                                             | 5        | 41.7     |          |           |            |            |
| Psilocybin                                      | 7        | 58.3     |          |           |            |            |
| DMT                                             | 0        | 0        |          |           |            |            |
| Mescaline                                       | 1        | 8.3      |          |           |            |            |
| MDMA                                            | 3        | 25.0     |          |           |            |            |
| Ketamine                                        | 3        | 25.0     |          |           |            |            |
| Cannabis product(s) used                        |          |          |          |           |            |            |
| Flower                                          | 11       | 91.7     |          |           |            |            |
| Concentrates                                    | 7        | 58.3     |          |           |            |            |
| Edibles                                         | 4        | 33.3     |          |           |            |            |
| Flower characteristics                          |          |          |          |           |            |            |
| Quantity (grams)                                |          |          | 2.36     | 2.56      | 0.25       | 8.00       |
| Within-session frequency (times used)           |          |          | 4.70     | 3.59      | 1.00       | 12.00      |
| THC content                                     |          |          |          |           |            |            |
| 0-4%                                            | 0        | 0        |          |           |            |            |
| 5-9%                                            | 0        | 0        |          |           |            |            |
| 10-14%                                          | 1        | 8.3      |          |           |            |            |
| 15-19%                                          | 2        | 16.7     |          |           |            |            |
| 20-24%                                          | 4        | 33.3     |          |           |            |            |
| 25-30%                                          | 2        | 16.7     |          |           |            |            |
| Greater than 30%                                | 0        | 0        |          |           |            |            |
| Unsure                                          | 2        | 16.7     |          |           |            |            |
| Missing                                         | 1        | 8.3      |          |           |            |            |
| Concentrate Characteristics                     |          |          |          |           |            |            |
| Dab quantity (# of dabs)                        |          |          | 2.75     | 0.96      | 2.00       | 4.00       |
| Cartridge quantity (# of hits)                  |          |          | 13.00    | 7.53      | 4.00       | 21.00      |
| Dab within-session frequency (times used)       |          |          | 5.25     | 3.86      | 3.00       | 11.00      |
| Cartridge within-session frequency (times used) |          |          | 11.25    | 7.09      | 4.00       | 21.00      |
| Dab THC content                                 |          |          |          |           |            |            |
| Less than 50%                                   | 1        | 8.3      |          |           |            |            |
| 50-59%                                          | 0        | 0        |          |           |            |            |
| 60-69%                                          | 1        | 8.3      |          |           |            |            |
| 70-79%                                          | 1        | 8.3      |          |           |            |            |
| 80-90%                                          | 1        | 8.3      |          |           |            |            |
| Greater than 90%                                | 0        | 0        |          |           |            |            |
| Unsure                                          | 0        | 0        |          |           |            |            |
| Missing                                         | 8        | 66.7     |          |           |            |            |
| Cartridge THC content                           |          |          |          |           |            |            |
| Less than 50%                                   | 1        | 8.3      |          |           |            |            |
| 50-59%                                          | 1        | 8.3      |          |           |            |            |
| 60-69%                                          | 0        | 0        |          |           |            |            |
| 70-79%                                          | 0        | 0        |          |           |            |            |
| 80-90%                                          | 2        | 16.7     |          |           |            |            |
| Greater than 90%                                | 0        | 0        |          |           |            |            |
| Unsure                                          | 0        | 0        |          |           |            |            |
| Missing                                         | 8        | 66.7     |          |           |            |            |
| Edible Characteristics                          |          |          |          |           |            |            |
| Edibles THC content (milligrams)                |          |          | 78.75    | 91.87     | 5.00       | 200.00     |
| Edibles within-session frequency (times used)   |          |          | 1.25     | 0.50      | 1.00       | 2.00       |

**Supplement 4. Cannabis and Psychedelic Product Descriptives for Theme 4: Enhanced Psychedelic “Come-down” Experience**

| <b>Characteristics</b>                          | <b>N</b> | <b>%</b> | <b>M</b> | <b>SD</b> | <b>Min</b> | <b>Max</b> |
|-------------------------------------------------|----------|----------|----------|-----------|------------|------------|
| Psychedelic(s) used                             |          |          |          |           |            |            |
| LSD                                             | 3        | 37.5     |          |           |            |            |
| Psilocybin                                      | 5        | 62.5     |          |           |            |            |
| DMT                                             | 1        | 12.5     |          |           |            |            |
| Mescaline                                       | 1        | 12.5     |          |           |            |            |
| MDMA                                            | 1        | 12.5     |          |           |            |            |
| Ketamine                                        | 0        | 0        |          |           |            |            |
| Cannabis product(s) used                        |          |          |          |           |            |            |
| Flower                                          | 3        | 37.5     |          |           |            |            |
| Concentrates                                    | 4        | 50.0     |          |           |            |            |
| Edibles                                         | 2        | 25.0     |          |           |            |            |
| Flower characteristics                          |          |          |          |           |            |            |
| Quantity (grams)                                |          |          | 3.50     | NA        | 3.50       | 3.50       |
| Within-session frequency (times used)           |          |          | 12.67    | 8.02      | 5.00       | 21.00      |
| THC content                                     |          |          |          |           |            |            |
| 0-4%                                            | 0        | 0        |          |           |            |            |
| 5-9%                                            | 0        | 0        |          |           |            |            |
| 10-14%                                          | 0        | 0        |          |           |            |            |
| 15-19%                                          | 1        | 12.5     |          |           |            |            |
| 20-24%                                          | 1        | 12.5     |          |           |            |            |
| 25-30%                                          | 0        | 0        |          |           |            |            |
| Greater than 30%                                | 0        | 0        |          |           |            |            |
| Unsure                                          | 1        | 12.5     |          |           |            |            |
| Missing                                         | 5        | 62.5     |          |           |            |            |
| Concentrate Characteristics                     |          |          |          |           |            |            |
| Dab quantity (# of dabs)                        |          |          | 2.50     | 0.71      | 2.00       | 3.00       |
| Cartridge quantity (# of hits)                  |          |          | 15.50    | 7.78      | 10.00      | 21.00      |
| Dab within-session frequency (times used)       |          |          | 2.00     | 0.00      | 2.00       | 2.00       |
| Cartridge within-session frequency (times used) |          |          | 15.50    | 7.78      | 10.00      | 21.00      |
| Dab THC content                                 |          |          |          |           |            |            |
| Less than 50%                                   | 0        | 0        |          |           |            |            |
| 50-59%                                          | 0        | 0        |          |           |            |            |
| 60-69%                                          | 0        | 0        |          |           |            |            |
| 70-79%                                          | 1        | 12.5     |          |           |            |            |
| 80-90%                                          | 0        | 0        |          |           |            |            |
| Greater than 90%                                | 0        | 0        |          |           |            |            |
| Unsure                                          | 1        | 12.5     |          |           |            |            |
| Missing                                         | 6        | 75.0     |          |           |            |            |
| Cartridge THC content                           |          |          |          |           |            |            |
| Less than 50%                                   | 0        | 0        |          |           |            |            |
| 50-59%                                          | 0        | 0        |          |           |            |            |
| 60-69%                                          | 0        | 0        |          |           |            |            |
| 70-79%                                          | 0        | 0        |          |           |            |            |
| 80-90%                                          | 2        | 25.0     |          |           |            |            |
| Greater than 90%                                | 0        | 0        |          |           |            |            |
| Unsure                                          | 0        | 0        |          |           |            |            |
| Missing                                         | 6        | 75.0     |          |           |            |            |
| Edible Characteristics                          |          |          |          |           |            |            |
| Edibles THC content (milligrams)                |          |          | 15.00    | 7.07      | 10.00      | 20.00      |
| Edibles within-session frequency (times used)   |          |          | 1.00     | NA        | 1.00       | 1.00       |

**Supplement 5. Cannabis and Psychedelic Product Descriptives for Theme 5: Overall  
Ambiguous Enhancement**

| <b>Characteristics</b>                          | <b>N</b> | <b>%</b> | <b>M</b> | <b>SD</b> | <b>Min</b> | <b>Max</b> |
|-------------------------------------------------|----------|----------|----------|-----------|------------|------------|
| Psychedelic(s) used                             |          |          |          |           |            |            |
| LSD                                             | 4        | 57.1     |          |           |            |            |
| Psilocybin                                      | 3        | 42.9     |          |           |            |            |
| DMT                                             | 1        | 14.3     |          |           |            |            |
| Mescaline                                       | 0        | 0        |          |           |            |            |
| MDMA                                            | 4        | 57.1     |          |           |            |            |
| Ketamine                                        | 1        | 14.3     |          |           |            |            |
| Cannabis product(s) used                        |          |          |          |           |            |            |
| Flower                                          | 4        | 57.1     |          |           |            |            |
| Concentrates                                    | 6        | 85.7     |          |           |            |            |
| Edibles                                         | 2        | 28.6     |          |           |            |            |
| Flower characteristics                          |          |          |          |           |            |            |
| Quantity (grams)                                |          |          | 5.10     | 6.93      | 0.20       | 10.00      |
| Within-session frequency (times used)           |          |          | 16.33    | 8.08      | 7.00       | 21.00      |
| THC content                                     |          |          |          |           |            |            |
| 0-4%                                            | 0        | 0        |          |           |            |            |
| 5-9%                                            | 0        | 0        |          |           |            |            |
| 10-14%                                          | 0        | 0        |          |           |            |            |
| 15-19%                                          | 0        | 0        |          |           |            |            |
| 20-24%                                          | 0        | 0        |          |           |            |            |
| 25-30%                                          | 1        | 14.3     |          |           |            |            |
| Greater than 30%                                | 1        | 14.3     |          |           |            |            |
| Unsure                                          | 2        | 28.6     |          |           |            |            |
| Missing                                         | 3        | 42.9     |          |           |            |            |
| Concentrate Characteristics                     |          |          |          |           |            |            |
| Dab quantity (# of dabs)                        |          |          | 8.00     | 8.83      | 2.00       | 21.00      |
| Cartridge quantity (# of hits)                  |          |          | 9.33     | 10.12     | 3.00       | 21.00      |
| Dab within-session frequency (times used)       |          |          | 3.67     | 0.58      | 3.00       | 4.00       |
| Cartridge within-session frequency (times used) |          |          | 4.50     | 0.71      | 4.00       | 5.00       |
| Dab THC content                                 |          |          |          |           |            |            |
| Less than 50%                                   | 0        | 0        |          |           |            |            |
| 50-59%                                          | 1        | 14.3     |          |           |            |            |
| 60-69%                                          | 0        | 0        |          |           |            |            |
| 70-79%                                          | 2        | 28.6     |          |           |            |            |
| 80-90%                                          | 0        | 0        |          |           |            |            |
| Greater than 90%                                | 0        | 0        |          |           |            |            |
| Unsure                                          | 2        | 28.6     |          |           |            |            |
| Missing                                         | 2        | 28.6     |          |           |            |            |
| Cartridge THC content                           |          |          |          |           |            |            |
| Less than 50%                                   | 0        | 0        |          |           |            |            |
| 50-59%                                          | 1        | 14.3     |          |           |            |            |
| 60-69%                                          | 2        | 28.6     |          |           |            |            |
| 70-79%                                          | 0        | 0        |          |           |            |            |
| 80-90%                                          | 1        | 14.3     |          |           |            |            |
| Greater than 90%                                | 0        | 0        |          |           |            |            |
| Unsure                                          | 0        | 0        |          |           |            |            |
| Missing                                         | 3        | 42.9     |          |           |            |            |
| Edible Characteristics                          |          |          |          |           |            |            |
| Edibles THC content (milligrams)                |          |          | 65.00    | 49.50     | 30.00      | 100.00     |
| Edibles within-session frequency (times used)   |          |          | 1.75     | 0.96      | 1.00       | 3.00       |

**Supplement 6. Cannabis and Psychedelic Product Descriptives for Participants Reporting an Adverse Reaction**

| <b>Characteristics</b>                          | <b>N</b> | <b>%</b> | <b>M</b> | <b>SD</b> | <b>Min</b> | <b>Max</b> |
|-------------------------------------------------|----------|----------|----------|-----------|------------|------------|
| Psychedelic(s) used                             |          |          |          |           |            |            |
| LSD                                             | 3        | 42.9     |          |           |            |            |
| Psilocybin                                      | 3        | 42.9     |          |           |            |            |
| DMT                                             | 1        | 14.3     |          |           |            |            |
| Mescaline                                       | 0        | 0        |          |           |            |            |
| MDMA                                            | 2        | 28.6     |          |           |            |            |
| Ketamine                                        | 1        | 14.3     |          |           |            |            |
| Cannabis product(s) used                        |          |          |          |           |            |            |
| Flower                                          | 5        | 71.4     |          |           |            |            |
| Concentrates                                    | 3        | 42.9     |          |           |            |            |
| Edibles                                         | 1        | 14.3     |          |           |            |            |
| Flower characteristics                          |          |          |          |           |            |            |
| Quantity (grams)                                |          |          | 3.00     | 5.04      | 0.25       | 12.00      |
| Within-session frequency (times used)           |          |          | 3.00     | 1.58      | 1.00       | 5.00       |
| THC content                                     |          |          |          |           |            |            |
| 0-4%                                            | 0        | 0        |          |           |            |            |
| 5-9%                                            | 0        | 0        |          |           |            |            |
| 10-14%                                          | 0        | 0        |          |           |            |            |
| 15-19%                                          | 2        | 28.6     |          |           |            |            |
| 20-24%                                          | 0        | 0        |          |           |            |            |
| 25-30%                                          | 0        | 0        |          |           |            |            |
| Greater than 30%                                | 0        | 0        |          |           |            |            |
| Unsure                                          | 3        | 42.9     |          |           |            |            |
| Missing                                         | 2        | 28.6     |          |           |            |            |
| Concentrate Characteristics                     |          |          |          |           |            |            |
| Dab quantity (# of dabs)                        |          |          | 1.50     | 0.71      | 1.00       | 2.00       |
| Cartridge quantity (# of hits)                  |          |          | 4.50     | 3.54      | 2.00       | 7.00       |
| Dab within-session frequency (times used)       |          |          | 1.50     | 0.71      | 1.00       | 2.00       |
| Cartridge within-session frequency (times used) |          |          | 2.00     | 1.41      | 1.00       | 3.00       |
| Dab THC content                                 |          |          |          |           |            |            |
| Less than 50%                                   | 0        | 0        |          |           |            |            |
| 50-59%                                          | 0        | 0        |          |           |            |            |
| 60-69%                                          | 0        | 0        |          |           |            |            |
| 70-79%                                          | 1        | 14.3     |          |           |            |            |
| 80-90%                                          | 0        | 0        |          |           |            |            |
| Greater than 90%                                | 0        | 0        |          |           |            |            |
| Unsure                                          | 1        | 14.3     |          |           |            |            |
| Missing                                         | 5        | 71.4     |          |           |            |            |
| Cartridge THC content                           |          |          |          |           |            |            |
| Less than 50%                                   | 1        | 14.3     |          |           |            |            |
| 50-59%                                          | 0        | 0        |          |           |            |            |
| 60-69%                                          | 0        | 0        |          |           |            |            |
| 70-79%                                          | 0        | 0        |          |           |            |            |
| 80-90%                                          | 1        | 14.3     |          |           |            |            |
| Greater than 90%                                | 0        | 0        |          |           |            |            |
| Unsure                                          | 0        | 0        |          |           |            |            |
| Missing                                         | 5        | 71.4     |          |           |            |            |
| Edible Characteristics                          |          |          |          |           |            |            |
| Edibles THC content (milligrams)                |          |          | 5.00     | N/A       | 5.00       | 5.00       |
| Edibles within-session frequency (times used)   |          |          | 1.00     | N/A       | 1.00       | 1.00       |
